# Supplementary material for: Weight-neutral approach and later sleep midpoint in adolescents with “emerging polycystic ovary syndrome phenotype” as vehicles for sustainable weight loss
Source: PubMed Central journal article supplement — F S Rep. 2024 Sep 6;5(4):402–10. doi: 10.1016/j.xfre.2024.09.001 (PMC11705593; doi:10.1016/j.xfre.2024.09.001), 2024-09-06
Supplement: mmc1.pdf [file mmc1.pdf]

## Appendix

Precision of assays:

|                        | Testosterone<br>(Peds/Female)                                                                                                                            | Estradiol                                                                                                         | Hemoglobin A1c                                                  | ALT                                                                   | AST                                                                   |
|------------------------|----------------------------------------------------------------------------------------------------------------------------------------------------------|-------------------------------------------------------------------------------------------------------------------|-----------------------------------------------------------------|-----------------------------------------------------------------------|-----------------------------------------------------------------------|
| Assay Type             | LC-MS/MS                                                                                                                                                 | Immunoassay                                                                                                       | HPLC                                                            | Spectrophotometric<br>340/410 nm                                      | Spectrophotometric<br>340/410 nm                                      |
| Approved/<br>Developed | Laboratory Developed<br>Test (LDT)*                                                                                                                      | FDA-approved                                                                                                      | FDA-approved                                                    | FDA-approved                                                          | FDA-approved                                                          |
| Linearity/ RR          | 5-2,300 ng/dL                                                                                                                                            | 12-15,000 pg/mL                                                                                                   | 4-18%                                                           | 7-3,300 U/L                                                           | 8-6,000 U/L                                                           |
| Precision              | L1 - Mean - 12 ng/dL; CV<br>= 6.8%<br>L2 - Mean - 58 ng/dL; CV<br>= 2.7%<br>L3 - Mean - 209 ng/dL;<br>CV = 3.9%<br>L4 - Mean - 1,104 ng/dL;<br>CV = 2.7% | L1 - Mean - 92 pg/mL;<br>CV = 5.1%<br>L2 - Mean - 462 pg/mL;<br>CV = 3.5%<br>L3 - Mean - 1394 pg/mL;<br>CV = 2.7% | L1 - Mean - 5.8%; CV<br>= 2%<br>L2 - Mean - 10.8%;<br>CV = 2.1% | L1 - Mean - 32 U/L;<br>CV = 3.7%<br>L2 - Mean - 191 U/L;<br>CV = 1.3% | L1 - Mean - 43 U/L;<br>CV = 2.8%<br>L2 - Mean - 258 U/L;<br>CV = 1.3% |
| Accuracy               | $y=0.9581X + 9.76^{**}$                                                                                                                                  |                                                                                                                   |                                                                 |                                                                       |                                                                       |

\* All LC-MS/MS assays are LDTs

\*\* Data from Comparison with Mayo LC-MS/MS assay
