# Supplementary figures and images for: Weight-neutral approach and later sleep midpoint in adolescents with “emerging polycystic ovary syndrome phenotype” as vehicles for sustainable weight loss
Source: PubMed Central journal article supplement — F S Rep. 2024 Sep 6;5(4):402–10. doi: 10.1016/j.xfre.2024.09.001 (PMC11705593; doi:10.1016/j.xfre.2024.09.001), 2024-09-06

# Girls: Ages 2–20 years

Body mass index-for-age percentiles

NAME \_\_\_\_\_

RECORD # \_\_\_\_\_

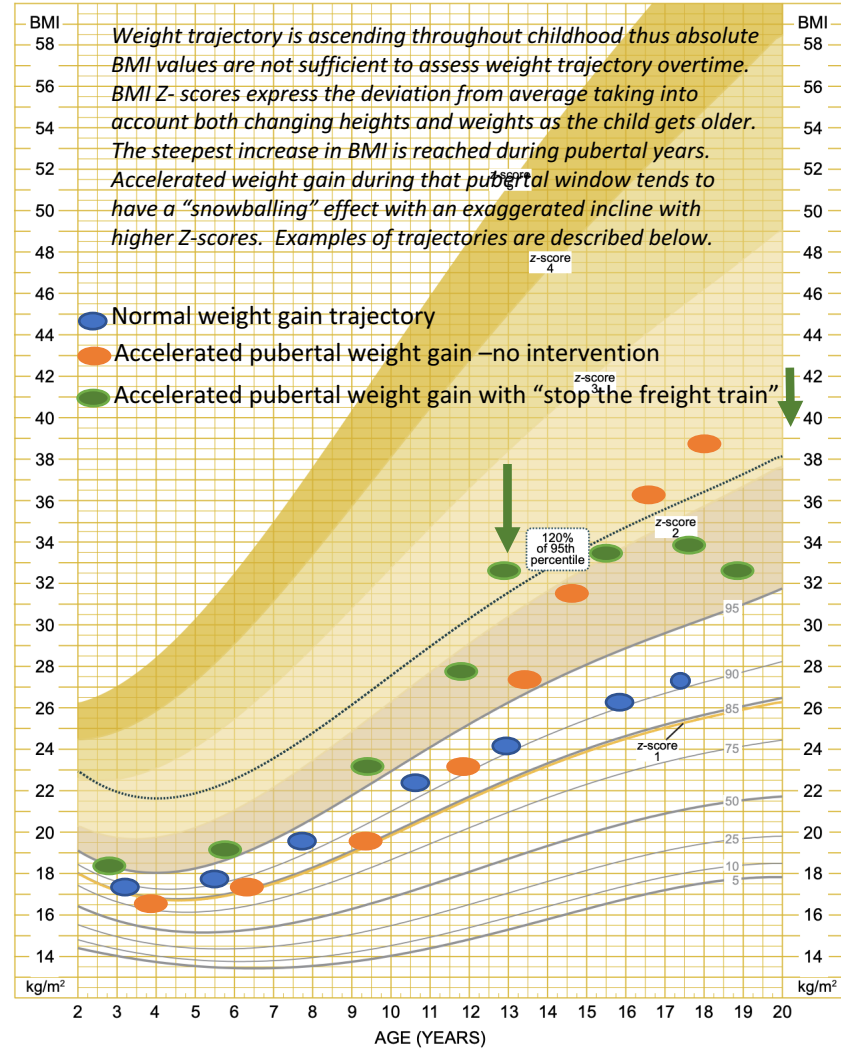

Supplement: mmc5.pdf [file mmc5.pdf]
